# Supplementary material for: Inhibiting Skp2 E3 Ligase Suppresses Bleomycin-Induced Pulmonary Fibrosis
Source: Int J Mol Sci. 2018 Feb 6;19(2):474. doi: 10.3390/ijms19020474 (PMC5855696; doi:10.3390/ijms19020474)
Supplement: Supplementary file 1 [file ijms-19-00474-s001.pdf]

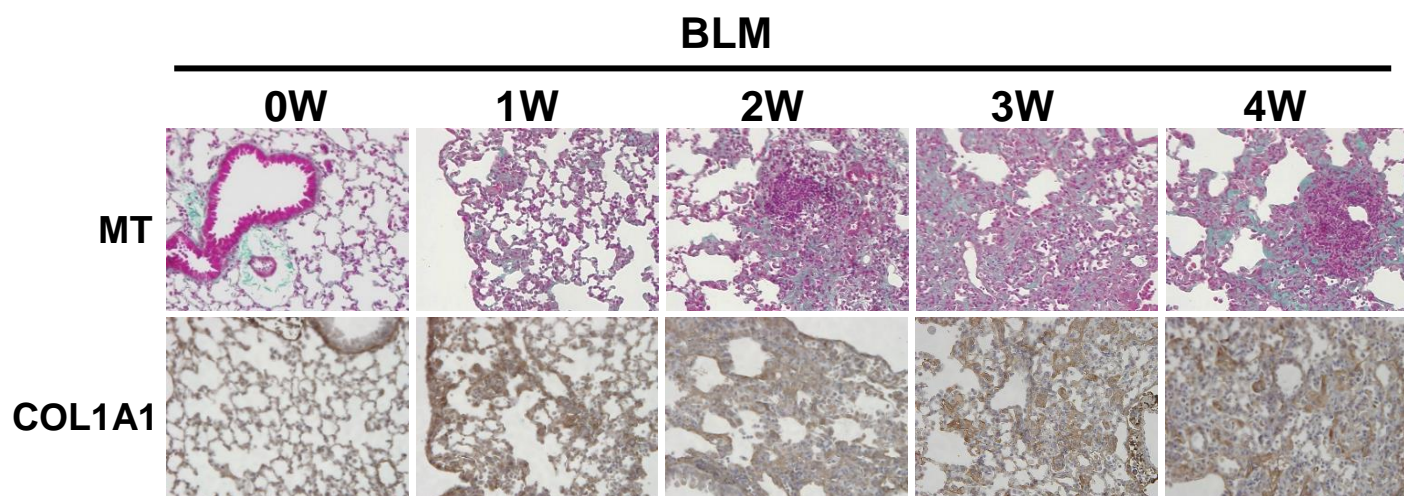

**Supplementary Figure S1. Pathological features of the BLM-induced pulmonary fibrosis model**

WT mice were intratracheally infused BLM (2 mg/kg). Mice were sacrificed, and lung tissues were harvested at the indicated weeks post-BLM-injection. Paraffin-embedded lung tissues were subjected to Masson's trichrome (MT) staining and anti-COL1A1 immunostaining.

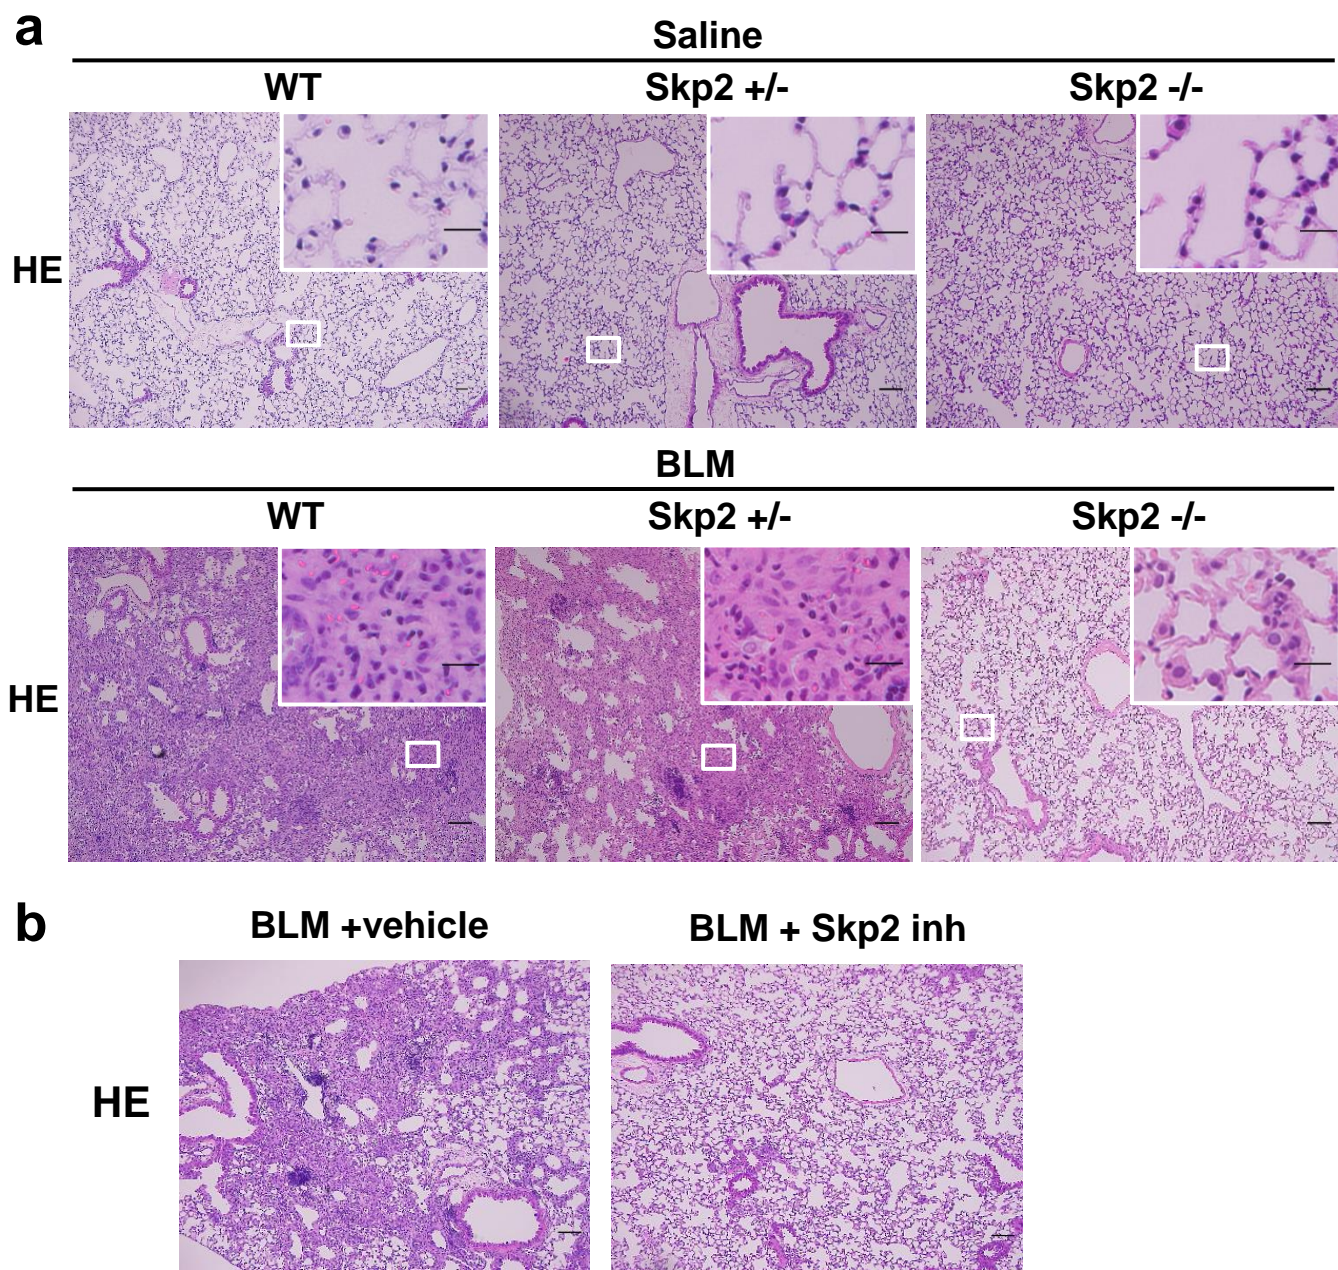

**Supplementary Figure S2. Pathological analysis of BLM-induced pulmonary fibrosis by HE staining**

**(a)** Representative images of HE-stained lungs from *Skp2*<sup>+/+</sup> (WT), *Skp2*<sup>+/-</sup> and *Skp2*<sup>-/-</sup> mice injected with saline (upper panels) or BLM (lower panels) from Figure 1. WT, *Skp2*<sup>+/-</sup> and *Skp2*<sup>-/-</sup> mice were intratracheally infused BLM (2 mg/kg) or saline. Two weeks after BLM treatment, the mice were sacrificed, and lung tissues were harvested. Paraffin-embedded lung tissues were subjected to HE staining. **(b)** Representative images of HE-stained lungs from BLM-infused mice treated with SZL-P1-41 or vehicle as described in Figure 5. WT mice were intratracheally infused BLM (2 mg/kg). One day after BLM treatment, SZL-P1-41 (80 mg/kg) or corn oil (vehicle) was daily injected for 13 days. Two weeks after BLM treatment, lung tissues were obtained. Paraffin-embedded lung tissues were analyzed by HE staining. The scale bar indicates 100  $\mu$ m in the low magnification images and 20  $\mu$ m in the high magnification images.

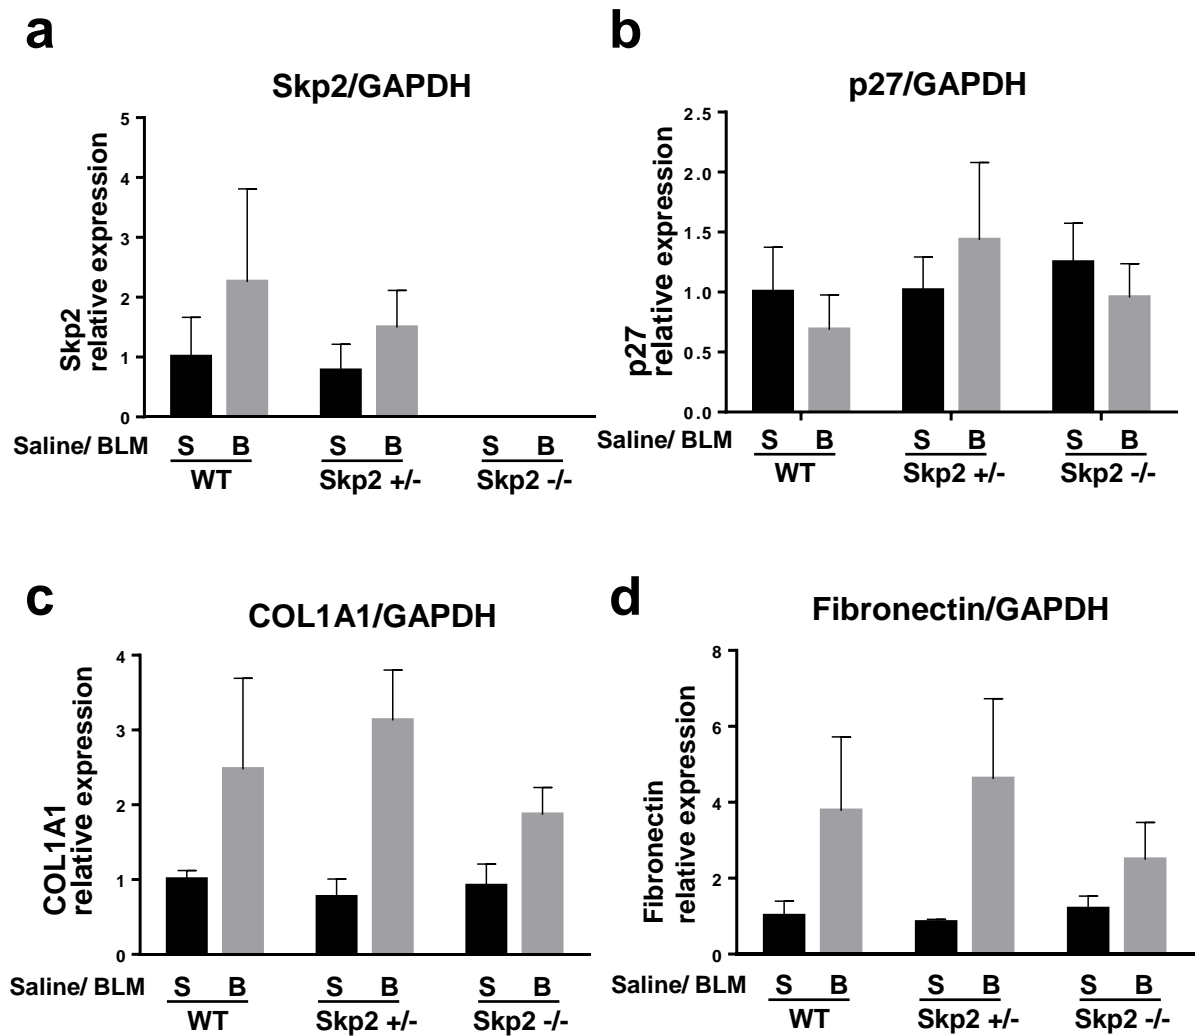

### Supplementary Figure S3. mRNA expression in BLM model mice.

Total RNAs were prepared from lung tissues obtained from indicated mice 2 weeks after BLM-infusion as described in Figure 1. Indicated mRNA expressions were analyzed by RT-qPCR.

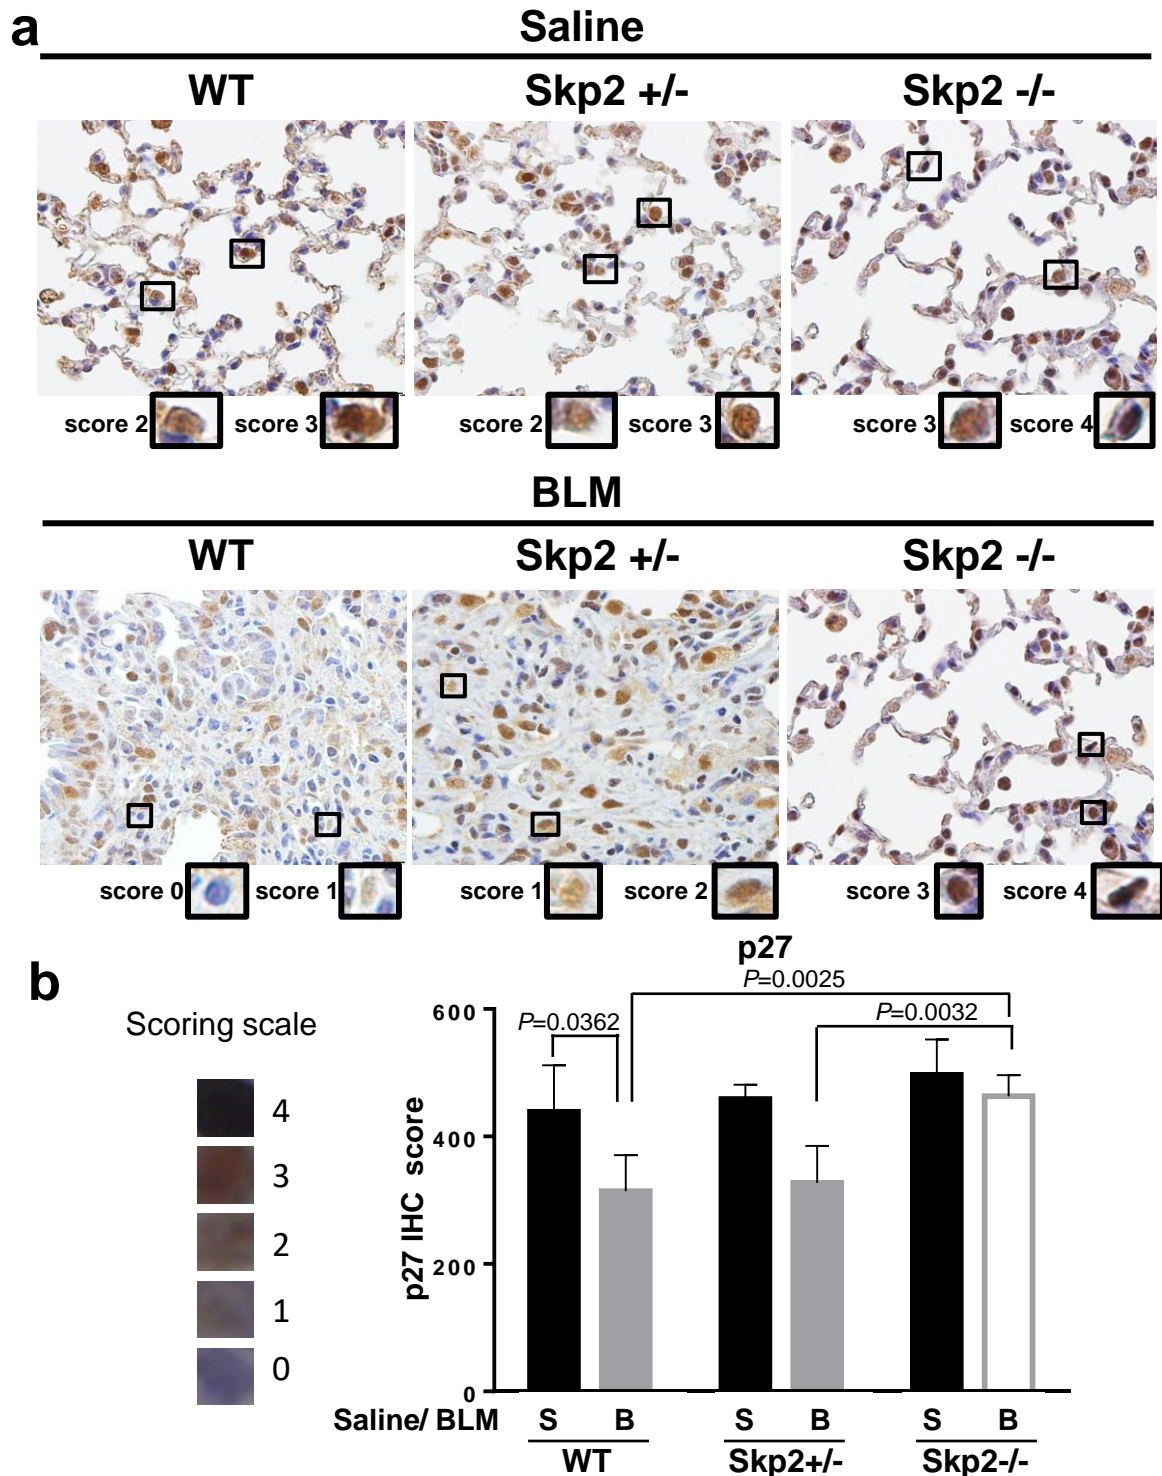

**Supplementary Figure S4. Effects of *Skp2*-deficiency on p27 levels in BLM-induced pulmonary fibrosis:**

(a) Representative DAB-colored images of p27 immunostaining. Paraffin-embedded lung tissues from *Skp2*<sup>+/+</sup> (WT), *Skp2*<sup>+/-</sup> and *Skp2*<sup>-/-</sup> mice treated with saline (upper panel) or BLM (lower panel) were subjected to immunostaining with anti-p27 antibody. The representative high-magnification images for the scoring are indicated below. The scale bar indicates 20  $\mu$ m. (b) p27 levels were significantly decreased by BLM-treatment in WT mice but not in *Skp2*<sup>-/-</sup> mice. Intensities of anti-p27 immunostaining were scored as indicated intensities, and then evaluated by Tukey's test as described in the Materials and Methods.

# SFTPC

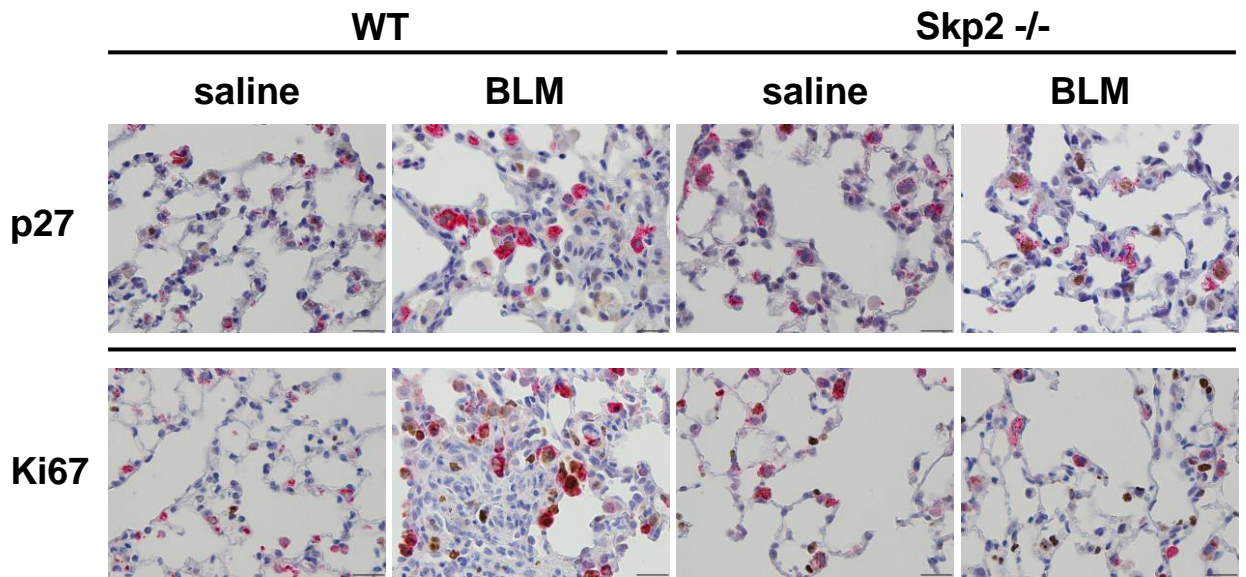

# Vimentin

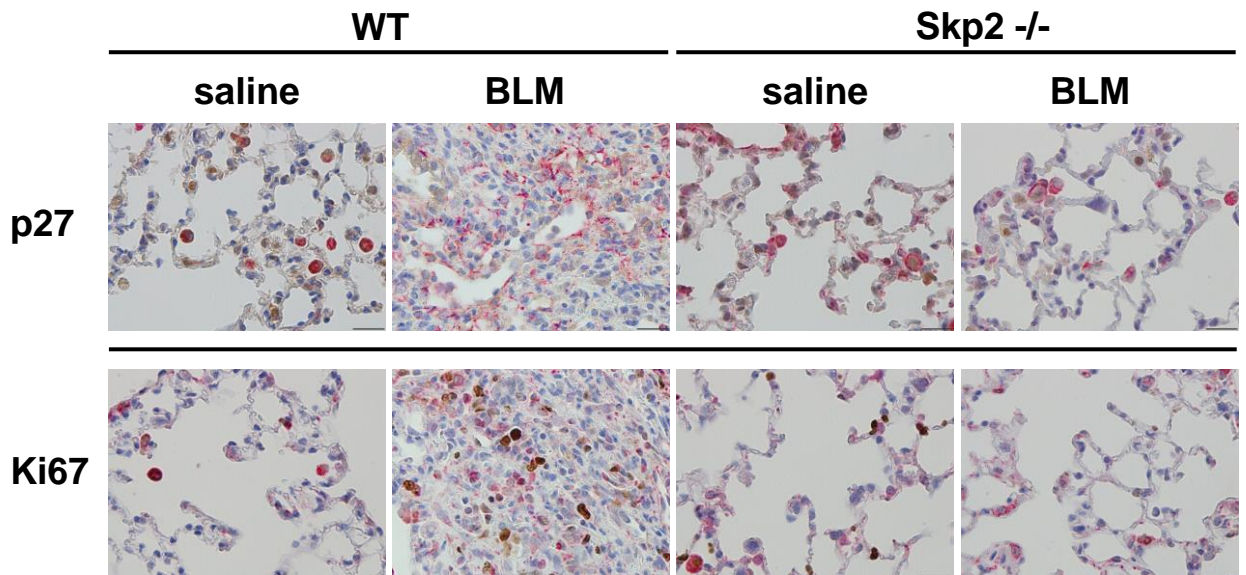

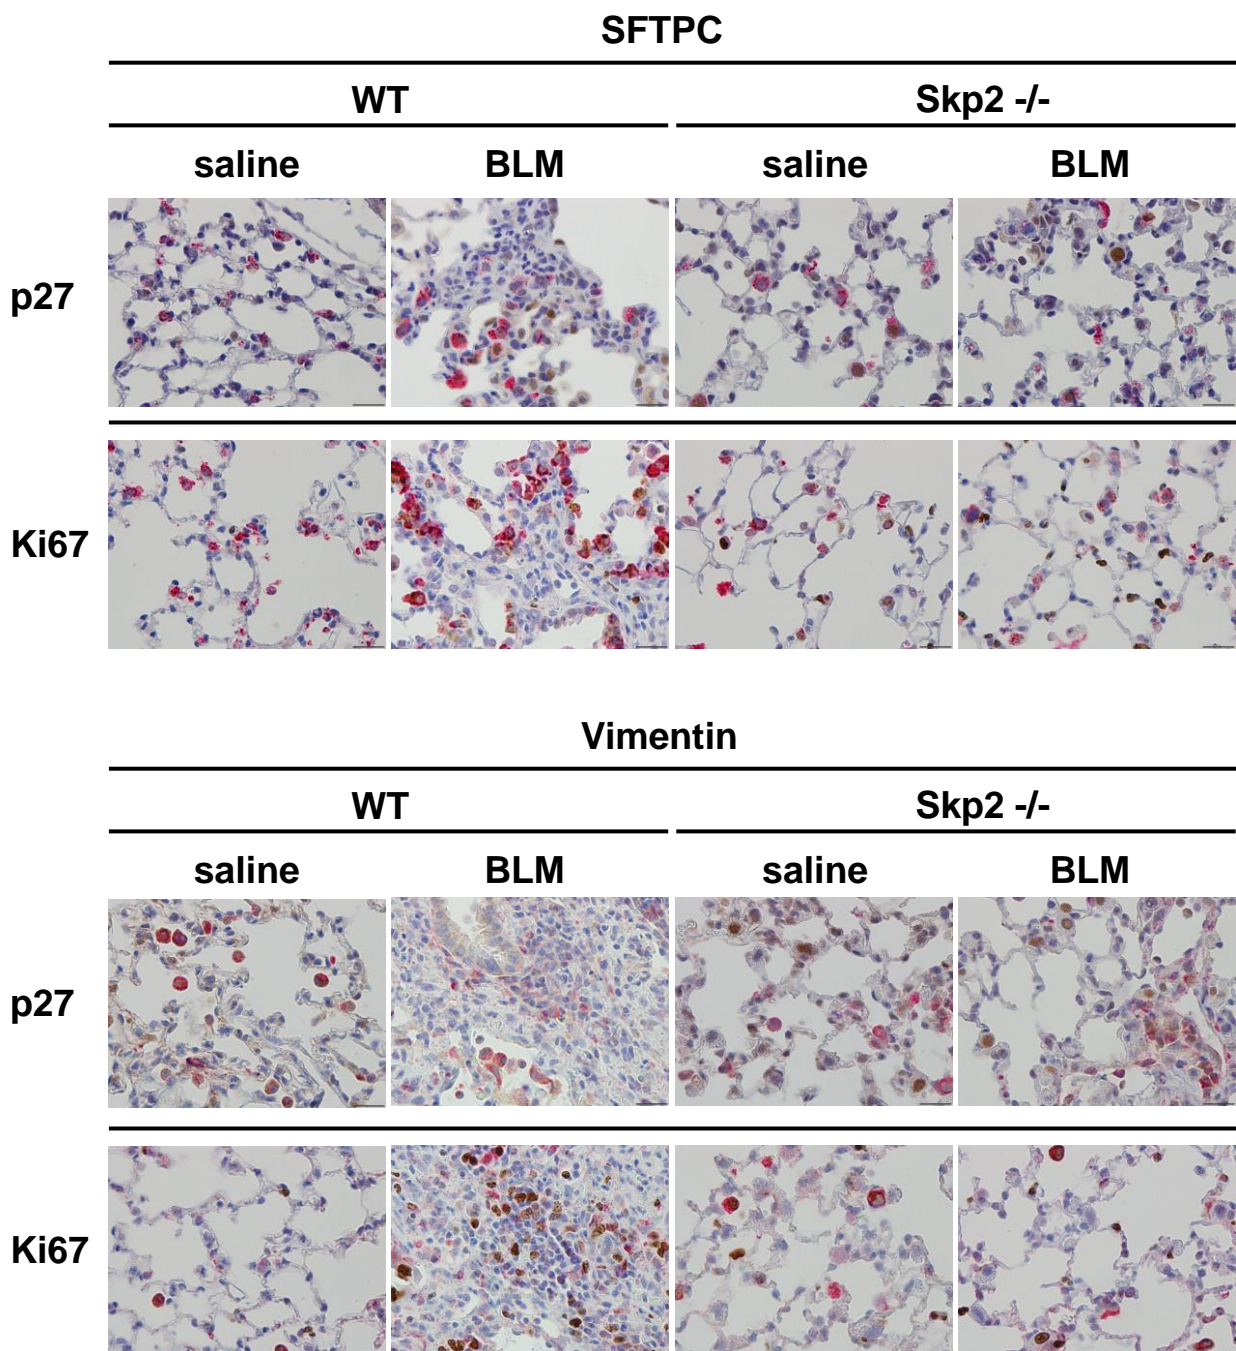

Supplementary Figure S5. Two additional image sets of the representative images of Figure 4

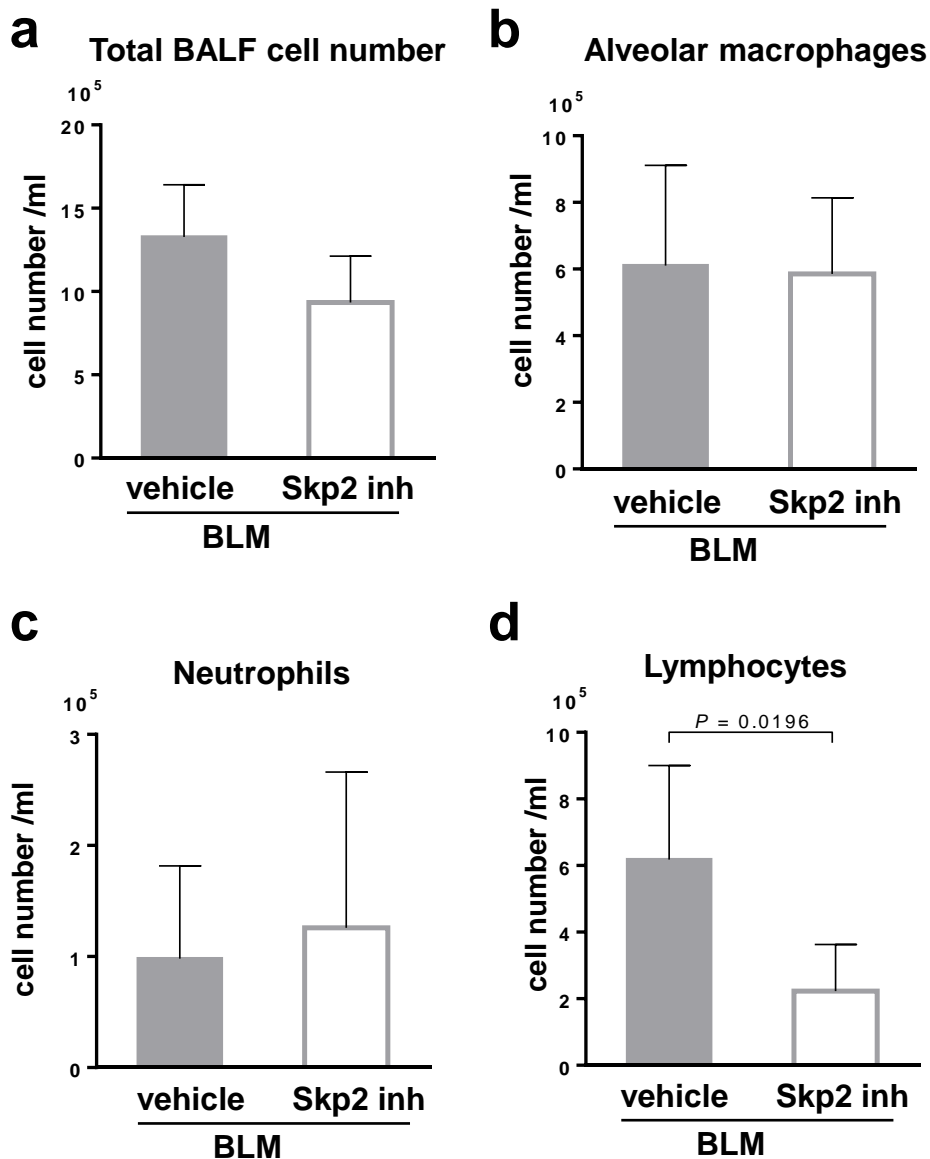

**Supplementary Figure S6. Effects of SZL-P1-41 treatment on bronchoalveolar lavage fluid cells in BLM model mice.**

BALF were obtained from mice 2 weeks after BLM-infusion as described in Figure 5. **(a)** The total number of BALF cells were counted and evaluated by Student's t-test. **(b-d)** Pulmonary alveolar macrophages **(b)**, neutrophils **(c)** and lymphocytes **(d)** in SZL-P1-41- or vehicle-treated BLM model mice were counted and evaluated by Student's t-test.

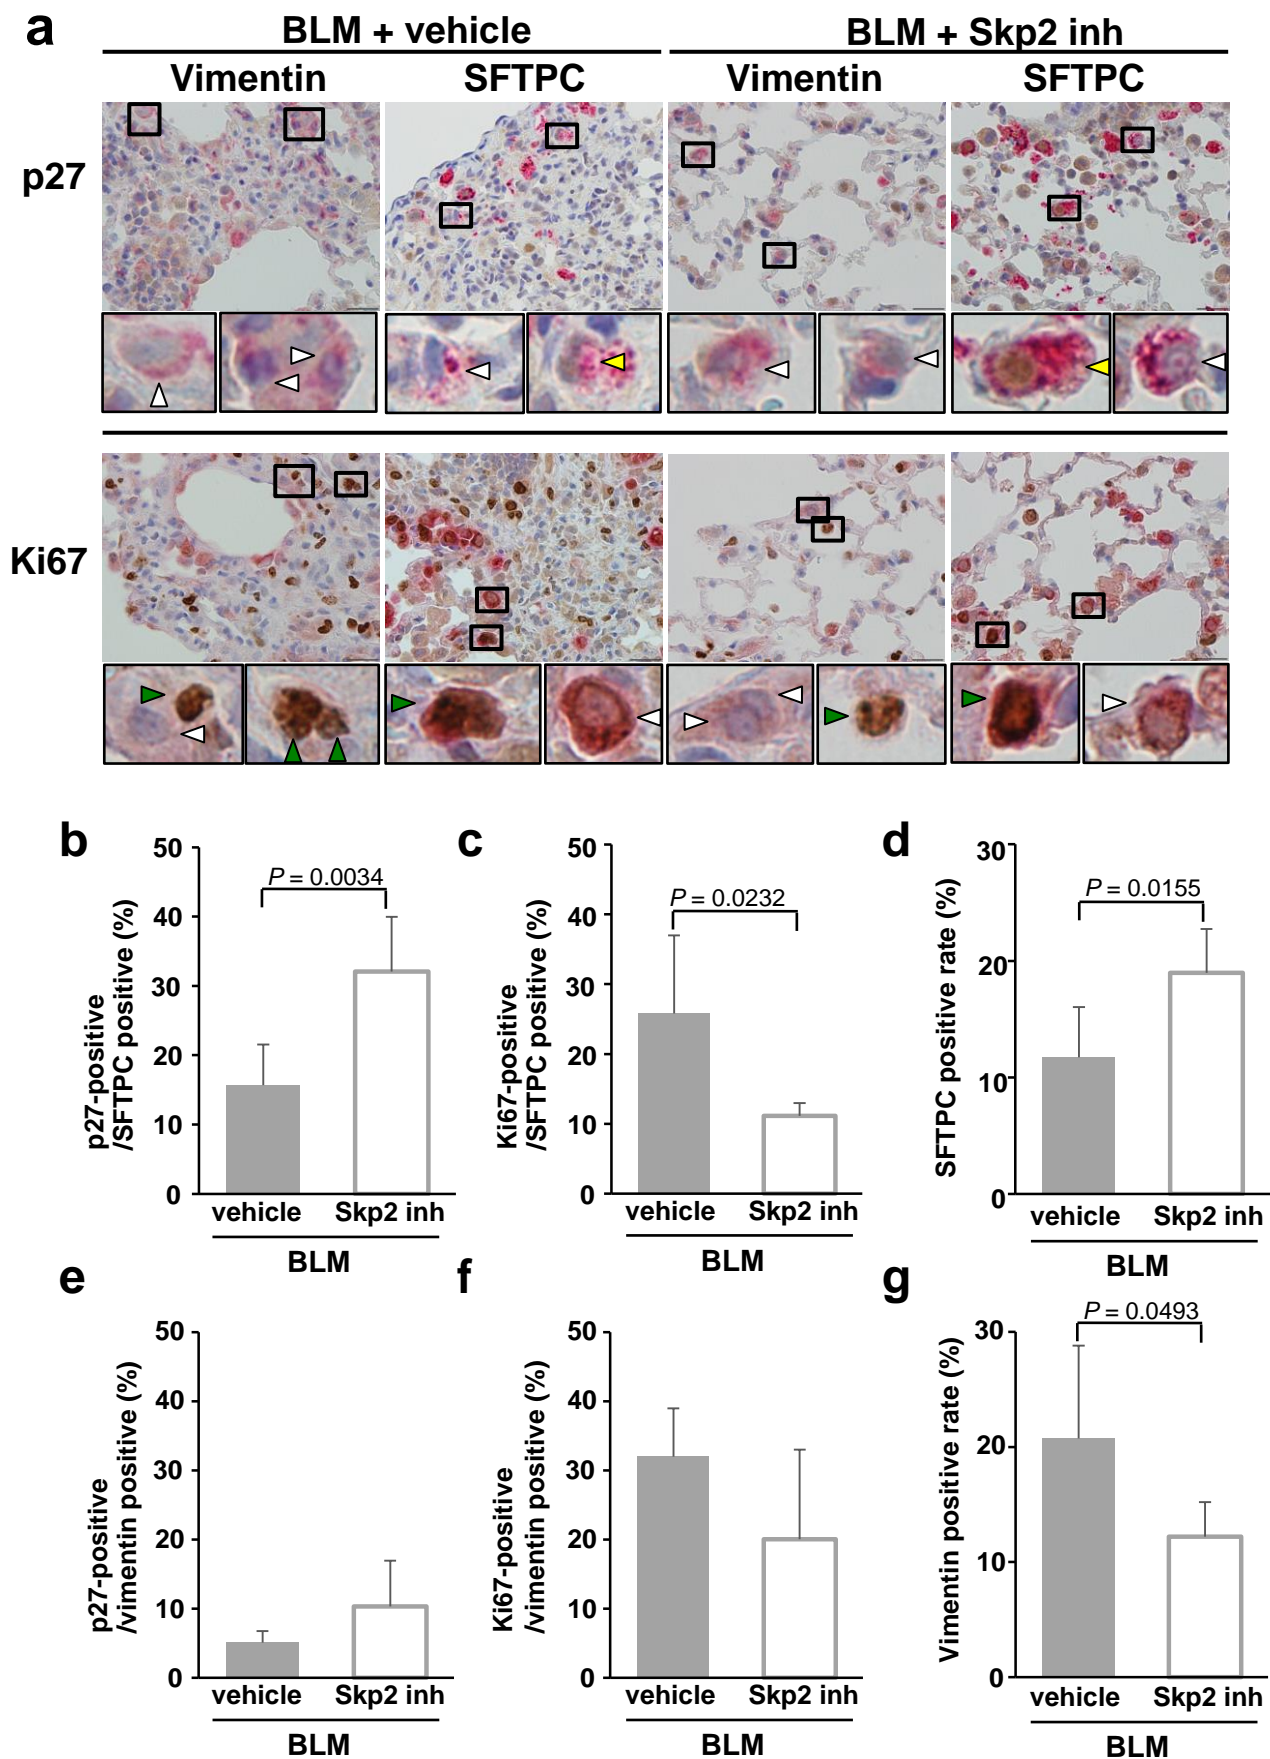

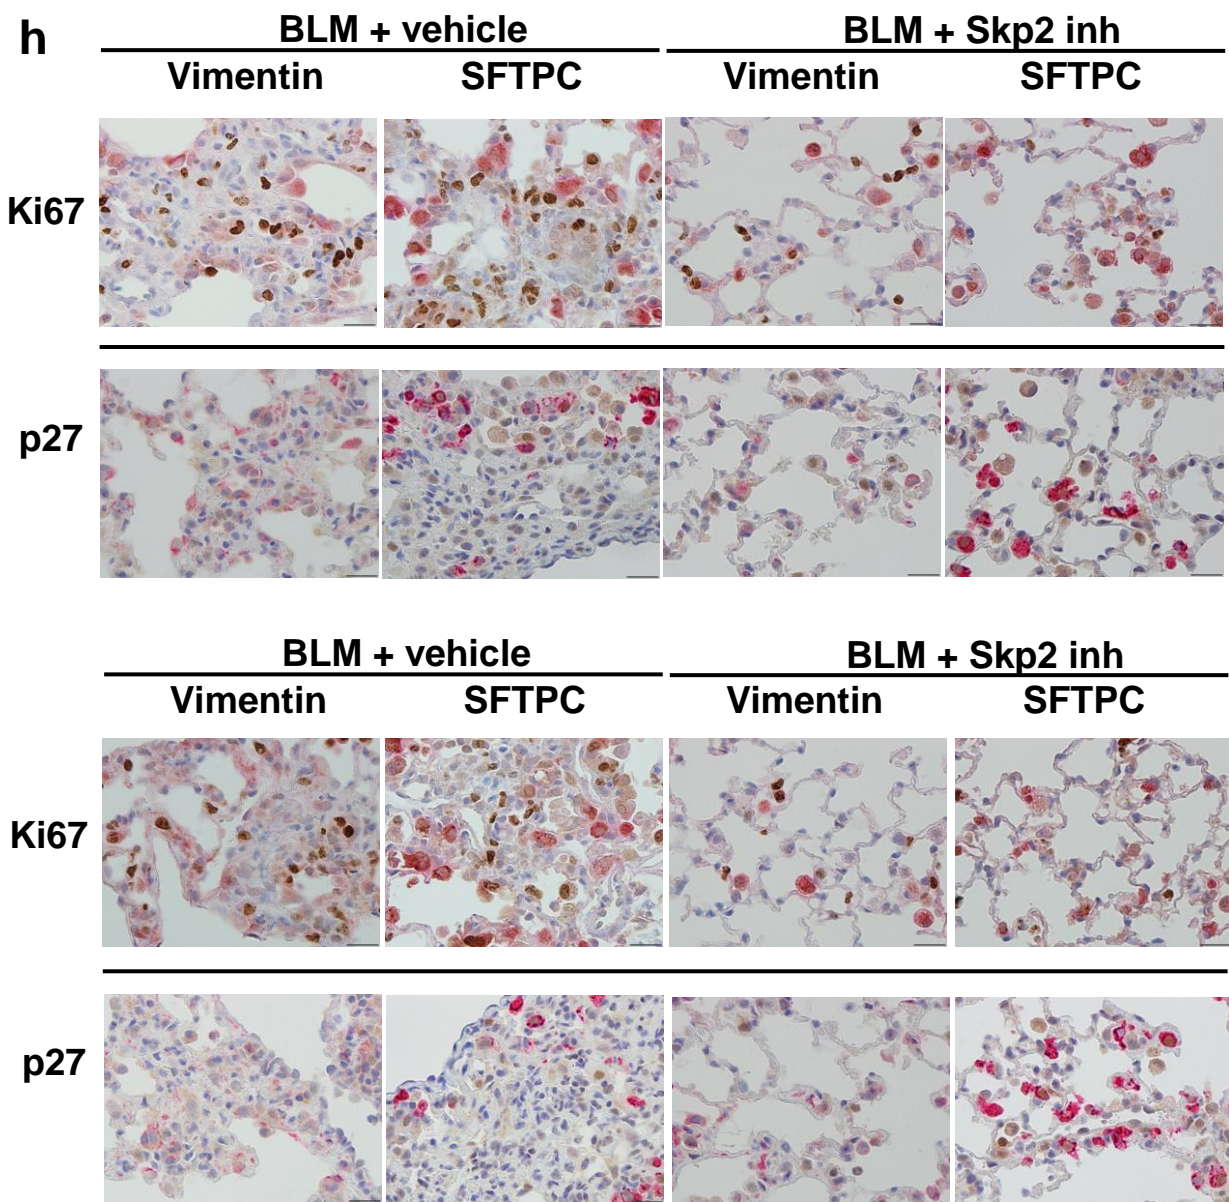

**Supplementary Figure S7. Effects of *Skp2*-inhibition on p27-expression and proliferation of type II alveolar epithelial cells and mesenchymal fibroblasts in BLM-induced pulmonary fibrosis:**

Paraffin-embedded lung tissues from BLM-administrated mice treated with vehicle or *Skp2* inhibitor SZL-P1-41 as indicated in Figure 5 were subjected to immunostaining with anti-p27 antibody or anti-Ki67 antibody using DAB and with anti-SFTPC antibody for type II alveolar epithelial cells (AECII) or anti-vimentin antibody for mesenchymal fibroblasts using alkaline phosphatase-mediated staining. (a) Representative double immunostaining images. The representative high-magnification images are indicated below. (b) Ratios of p27-positive cells in SFTPC-positive cells. (c) Ratios of Ki67-positive cells in SFTPC-positive cells. (d) The abundance of SFTPC-positive AECII cells. (e) Ratios of p27-positive cells in vimentin-positive cells. (f) Ratios of Ki67-positive cells in vimentin-positive cells. (g) The abundance of vimentin-positive mesenchymal fibroblasts. (h) Two additional image sets were indicated to support the result. The scale bar indicates 20  $\mu$ m.

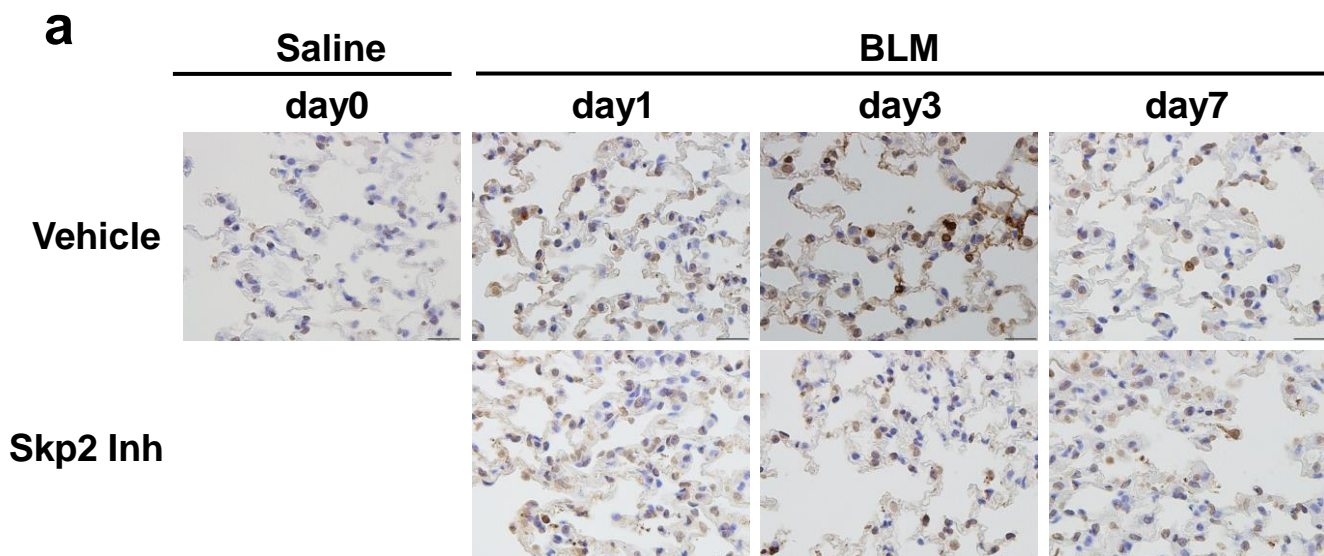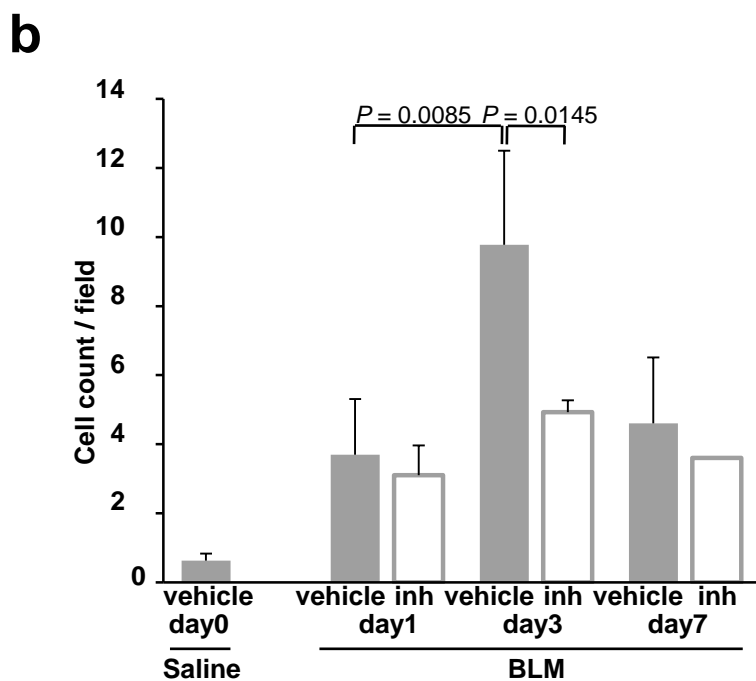

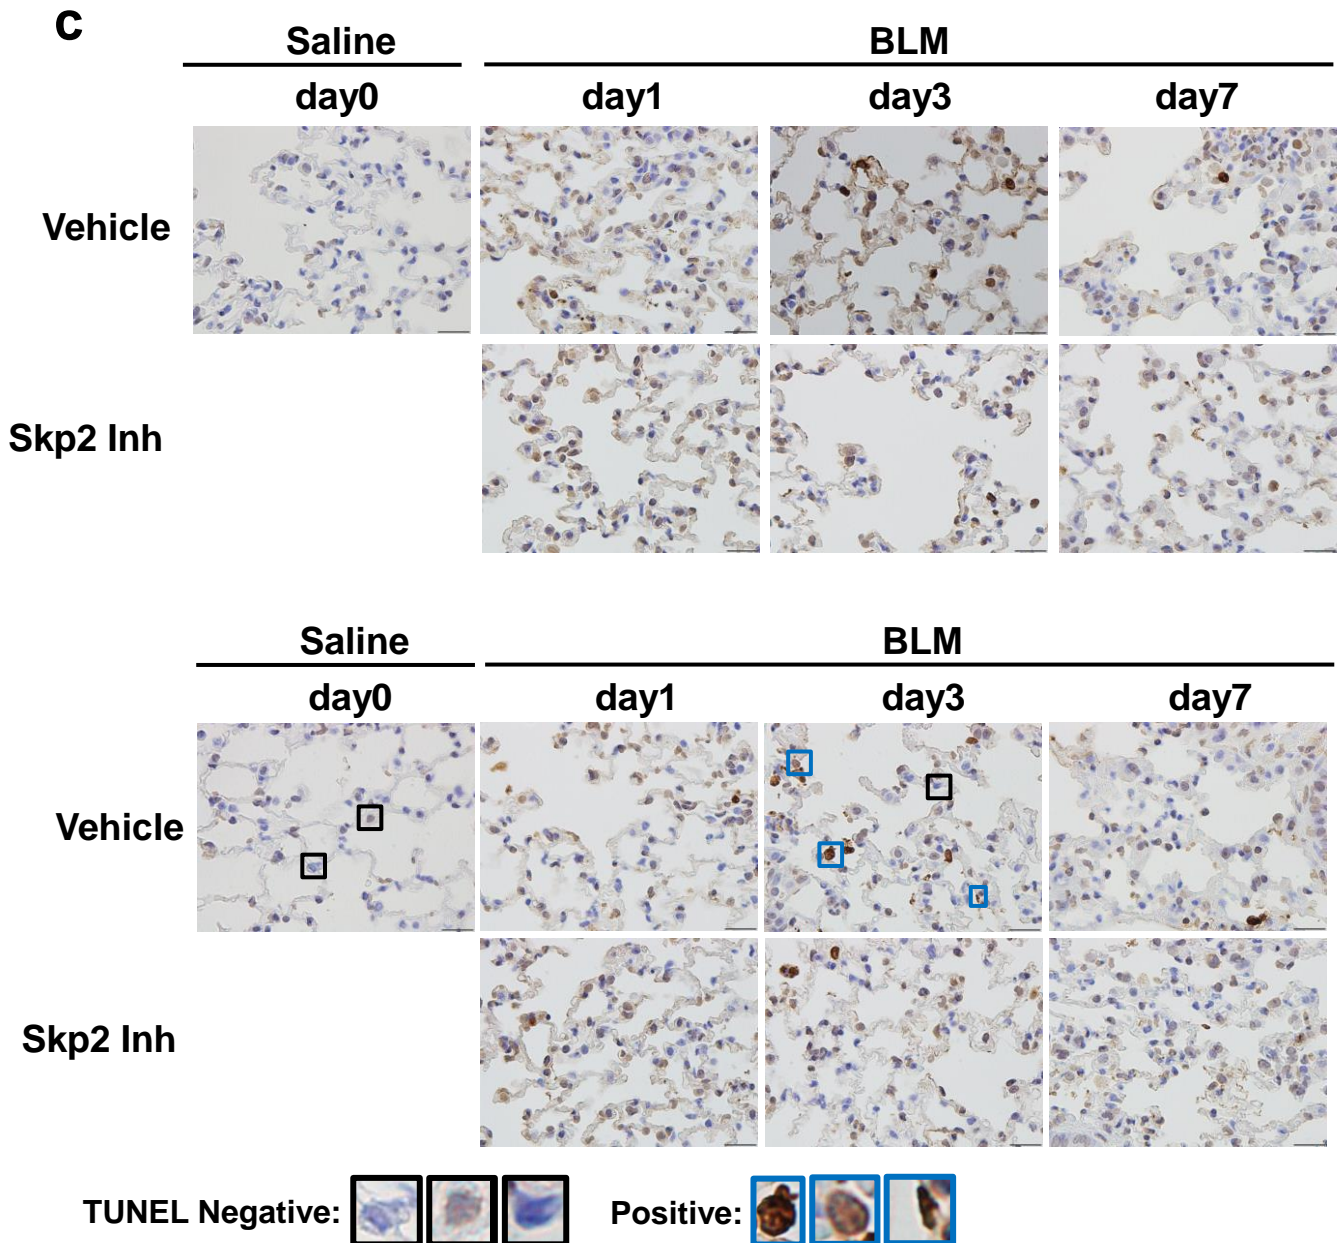

**Supplementary Figure S8. Effect of Skp2 inhibition on the early apoptosis in BLM-induced fibrosis.**

Wild type mice were intratracheally infused BLM (2 mg/kg). The Skp2 inhibitor SZL-P1-41 (80 mg/kg) (n=4) or corn oil (vehicle) (n=4) was injected intraperitoneally daily from day 1 to day 7. Indicated day after BLM treatment, lung tissues were obtained from the mice and analyzed by TUNEL assay using ApopTag (Merck Millipore). The representative images were indicated in (a). TUNEL-positive cells were counted and evaluated by Tukey's test (b). (c) Two additional image sets were indicated to support the result. The scale bar indicates 20  $\mu$ m.

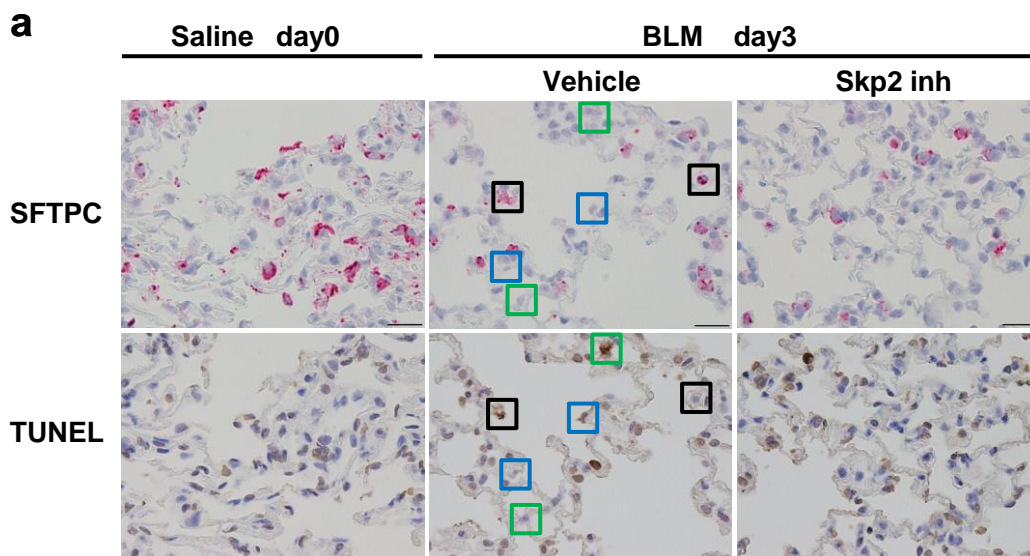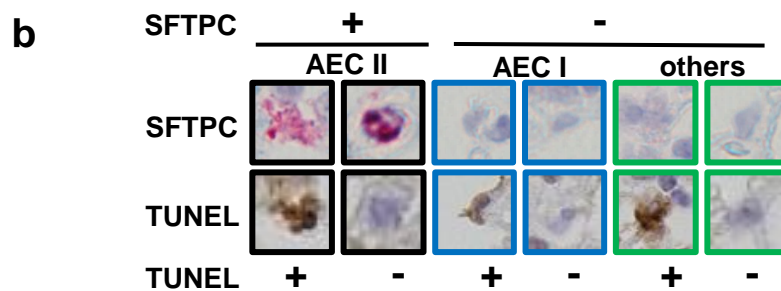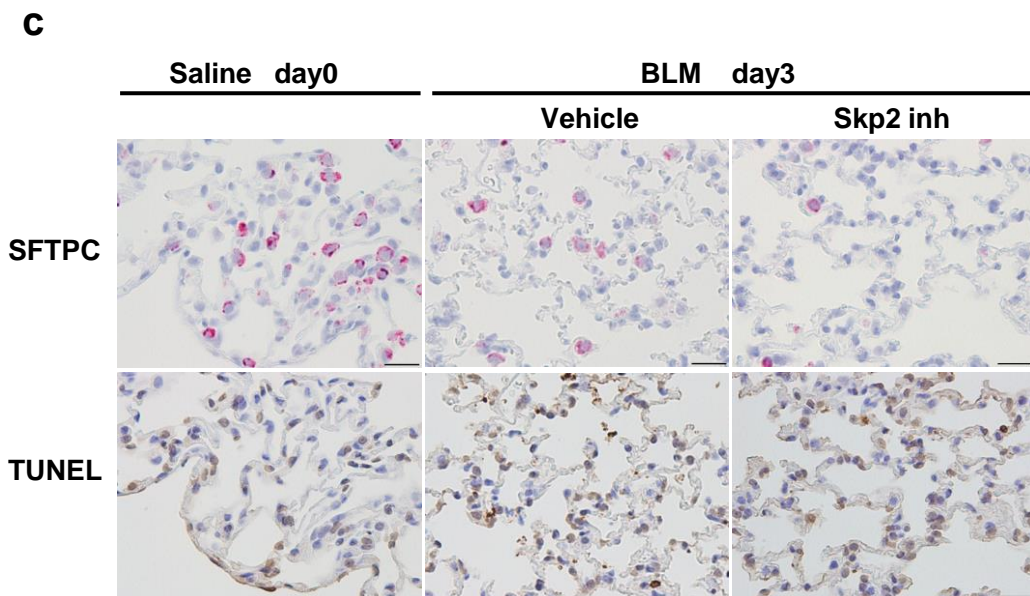

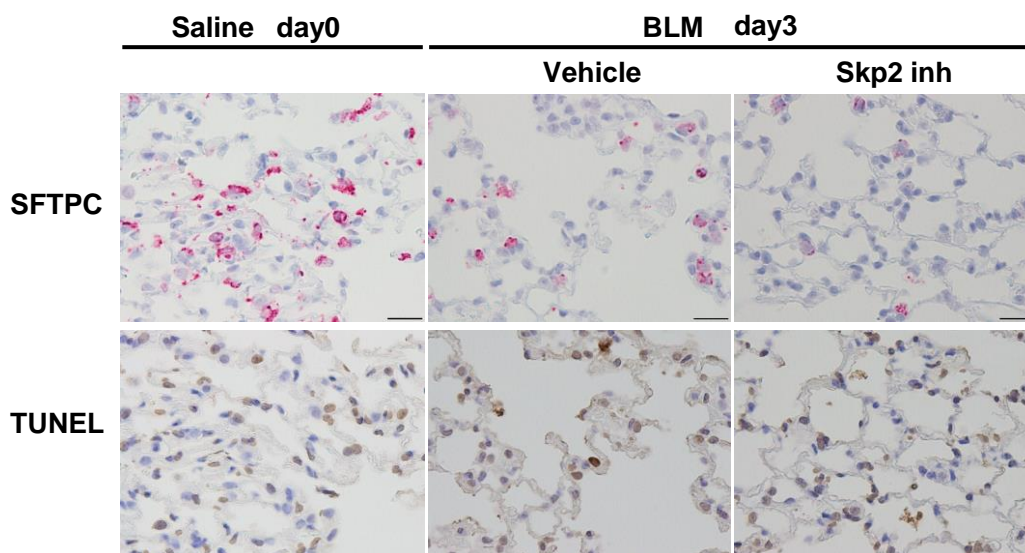

**Supplementary Figure S9. Immunostaining of consecutive lung sections with anti-SFTPC antibody to identify TUNEL-positive cell types in the early phase of BLM-induced pulmonary fibrosis.**

(a, c) The consecutive mirror image sections were prepared from the lung tissues using Supplementary Figure S8. These sections were subjected to TUNEL-staining and SFTPC-immunostaining, separately. (b) The representative high-magnification images of indicated cells. (c) Two additional image sets were indicated to support the result. The scale bar indicates 20  $\mu$ m.
